# Supplementary material for: Marriage and risk of dementia: systematic review and meta-analysis of observational studies
Source: PubMed Central journal article supplement (PMC5869449; doi:10.1136/jnnp-2017-316274), 2017-11-28

## Supplementary material

**Supplementary table 1. Search terms used**

|                 |            |                                                                                                                                                                                                                                                                                                                                                                                                                                                                           |
|-----------------|------------|---------------------------------------------------------------------------------------------------------------------------------------------------------------------------------------------------------------------------------------------------------------------------------------------------------------------------------------------------------------------------------------------------------------------------------------------------------------------------|
|                 |            | <b>exp marital status/ OR marriage.tw. OR married.tw. OR marital status.tw. OR spouse.tw</b>                                                                                                                                                                                                                                                                                                                                                                              |
| <b>Medline</b>  | <b>AND</b> | <b>exp Dementia/ OR dementia.tw. OR alzheimer*.tw</b>                                                                                                                                                                                                                                                                                                                                                                                                                     |
|                 | <b>AND</b> | <b>Epidemiologic studies/ OR exp case control studies/ OR exp cohort studies/ OR Case control.tw. OR (cohort adj (study or studies)).tw. OR Cohort analy\$.tw. OR (Follow up adj (study or studies)).tw. OR (observational adj (study or studies)).tw. OR Longitudinal.tw. OR Retrospective.tw. OR Cross sectional.tw. OR Cross-sectional studies/</b>                                                                                                                    |
|                 |            | <b>exp marriage/ OR marriage.tw. OR married.tw. OR marital status.tw. OR spouse.tw</b>                                                                                                                                                                                                                                                                                                                                                                                    |
| <b>Embase</b>   | <b>AND</b> | <b>exp Dementia/ OR dementia.tw. OR alzheimer*.tw</b>                                                                                                                                                                                                                                                                                                                                                                                                                     |
|                 | <b>AND</b> | <b>Clinical study/ OR Case control study OR Case control study OR Longitudinal study/ OR Retrospective study/ OR Prospective study/ OR Cohort analysis/ OR (Cohort adj (study or studies)).mp. OR (Case control adj (study or studies)).tw. OR (follow up adj (study or studies)).tw. OR (observational adj (study or studies)).tw. OR (epidemiologic\$ adj (study or studies)).tw. OR (cross sectional adj (study or studies)).tw. NOT Randomized controlled trials/</b> |
|                 |            | <b>exp marriage/ OR marriage.tw. OR married.tw. OR marital status.tw. OR spouse.tw</b>                                                                                                                                                                                                                                                                                                                                                                                    |
| <b>PsycINFO</b> | <b>AND</b> | <b>exp dementia/ OR dementia.mp. OR Alzheimer.mp</b>                                                                                                                                                                                                                                                                                                                                                                                                                      |
|                 | <b>AND</b> | <b>exp Longitudinal studies/ OR cohort.mp OR prospective.mp OR longitudinal.mp OR retrospective.mp OR ((case* adj5 control*) or (case adj3 comparison*) or case-comparison or control group*).ti,ab.id. NOT "literature review".md</b>                                                                                                                                                                                                                                    |

Supplementary table 2. Full data extracted from cohort, case-control and cross-sectional studies

| Study         | Recruitment source and population at start (response rate)<br><br>Mean population age at baseline             | n of participant at study inception<br><br>n of cases at follow-up | Mean/range of years follow-up                                              | n un-explained loss to follow-up / missing data % | Measurements of marital status (%)<br>At what age, and approx. what year was marital status recorded?       | Analysis adjusted for:                                                                                                     | Statistical model used                  | Outcome How was dementia assessed?                                                                                 | Results                                                                                  | Adjusted results (95% Confidence interval)                                                                                                           | Un-adjusted results |
|---------------|---------------------------------------------------------------------------------------------------------------|--------------------------------------------------------------------|----------------------------------------------------------------------------|---------------------------------------------------|-------------------------------------------------------------------------------------------------------------|----------------------------------------------------------------------------------------------------------------------------|-----------------------------------------|--------------------------------------------------------------------------------------------------------------------|------------------------------------------------------------------------------------------|------------------------------------------------------------------------------------------------------------------------------------------------------|---------------------|
| <b>COHORT</b> |                                                                                                               |                                                                    |                                                                            |                                                   |                                                                                                             |                                                                                                                            |                                         |                                                                                                                    |                                                                                          |                                                                                                                                                      |                     |
| Amieva 2010   | PAQUID, France: Longitudinal population-based study of randomly selected older adults (69%)<br><br>73.7 years | 2089<br><br>461 all Dementia<br>373 Alzheimer's Disease            | 5-15<br><br>Cases excluded if dementia detected within 3yr 'latent period' | 1264<br>38%                                       | Married (60.7%)<br>Widowed (32.5%)<br>Divorced (2.7%)<br>Single (4.2%)<br><br>Assessed for over 65s in 1988 | Age; Sex; Edu; baseline cognition; positive affect; ADLs; Chronic diseases; quality and quantity of social network contact | Cox regression (with age as time-scale) | <b>Dementia</b><br><br><b>Alzheimer's Disease</b><br><br>(Clinical assessment by neurologist using valid criteria) | Married<br>Widowed<br>Divorced<br>Single<br><br>Married<br>Widowed<br>Divorced<br>Single | HR 1<br>HR 0.88 (0.7, 1.1)<br>HR 0.94 (0.5, 1.7)<br>HR 1.29 (0.7, 2.1)<br><br>HR 1<br>HR 0.92 (0.7, 1.1)<br>HR 0.88 (0.4, 1.7)<br>HR 1.36 (0.7, 2.3) | Not provided        |
| Arai 2004     | Hokkaido, Japan. Community-based prospective study<br><br>69 years                                            | 853<br><br>34                                                      | 5                                                                          | No data provided                                  | Living with spouse 71%<br>Not living with spouse 29%<br>Living with others 15%<br><br>Assessed in 1998      | Age; Sex                                                                                                                   | Mantel-Haentzel                         | <b>Dementia</b><br><br>Clinical assessment based on algorithm                                                      | Living with spouse<br>Not living with spouse                                             | RR 1<br>RR 2.0 (1.0, 5.0)                                                                                                                            | 1<br>2.2            |
| Bae 2014      | Korean Longitudinal Study on Cognitive Aging and Dementia (71.6%)<br><br>71.7                                 | 359<br><br>45 all dementia<br>9 Alzheimer's Disease                | 3.5                                                                        | 144<br>40%                                        | Married 70.2%<br>Widowed 29.8%<br>Divorced 0%<br>Single 0%<br><br>Assessed in 2008                          | Age, sex                                                                                                                   | Cox regression                          | <b>Dementia</b><br><br><b>Alzheimer's Disease</b><br><br>Clinical assessment by psychiatrist using valid criteria  | Married<br>Widowed<br>Divorced<br>Single<br><br>Married<br>Widowed<br>Divorced<br>Single | HR 1<br>HR 1.79 (0.5, 6.5)<br>HR 0<br>HR 0<br><br>HR 1<br>HR 4.40 (0.8, 24.7)<br>HR 0<br>HR 0                                                        | Not provided        |

|                  |                                                                                                                                                        |                                                             |      |               |                                                                                                                                                          |                                                                                                                         |                     |                                                                                                                     |                                                                                                                                                                                       |                                                                                                                  |                                            |
|------------------|--------------------------------------------------------------------------------------------------------------------------------------------------------|-------------------------------------------------------------|------|---------------|----------------------------------------------------------------------------------------------------------------------------------------------------------|-------------------------------------------------------------------------------------------------------------------------|---------------------|---------------------------------------------------------------------------------------------------------------------|---------------------------------------------------------------------------------------------------------------------------------------------------------------------------------------|------------------------------------------------------------------------------------------------------------------|--------------------------------------------|
| Bickel 1994      | Mannheim, Germany. Longitudinal population-based cohort of elderly persons in private households (82.1%)<br><br>73.8 years                             | 331<br><br>34                                               | 7-8  | 12<br>4%      | Married 42.4%<br>Widowed 47.5%<br>Divorced 3.8%<br>Single 6.4%<br><br>Assessed in 1992                                                                   | Age, sex                                                                                                                | Cox regression      | <b>Dementia</b><br><br>Clinical assessment by trained physicians based using valid criteria                         | Married<br>Widowed<br>Divorced<br>Single                                                                                                                                              | HR 1<br>HR 1.59 (0.7, 3.5)<br>HR 3.17 (0.6, 16.4)<br>HR 2.90 (0.8, 10.5)                                         | 1<br>1.86<br>3.21<br>3.56                  |
| Fratiglioni 2000 | Kungsholmen, Sweden: Longitudinal population-based study of community-dwelling people born before 1913 (76%)<br><br>81.5 years                         | 1368<br><br>176                                             | 3    | 165<br>12%    | Married 27.8%<br>Widowed 45.4%<br>Divorced 5.9%<br>Single 20.9%<br><br>Assessed in 1987                                                                  | Age; Sex;<br>BL cognition                                                                                               | Cox regression      | <b>Dementia</b><br><br>Clinical assessment by 2 independent physicians using valid criteria                         | Married<br>Widowed<br>Divorced<br>Single                                                                                                                                              | HR 1<br>HR 1.45 (0.9, 2.2)<br>HR 1.04 (0.5, 2.4)<br>HR 1.77 (1.1, 2.9)                                           | 1<br>1.6 (wid or div)<br>1.8               |
| Håkansson 2009   | CAIDE project. Longitudinal population-based study derived from random sampling in two regions in Eastern Finland (82-90%)<br><br>71.3 years           | 2000<br><br>44                                              | 20.9 | 511<br>2.7%   | Married 80.1%<br>Widowed 7.8%<br>Divorced 4.4%<br>Single 7.8%<br><br>Mid-life – people aged 50.5 between 1972-87<br>Late life – people aged 71.3 in 1998 | Age; Sex; Edu;<br>ApoE; BMI; BP;<br>Cholesterol;<br>Occupation;<br>Physical activity;<br>Region; Smoking;<br>Depression | Logistic regression | <b>Alzheimer's Disease</b><br><br>Clinical assessment by expert board using valid criteria                          | <i>Mid-life marital status</i><br>Married<br>Widowed<br>Single/divorced<br><br><i>Mid-and late-life marital status change</i><br>Remained married<br>Became single<br>Remained single | OR 1<br>OR 2.52 (0.8, 7.7)<br>OR 1.78 (0.7, 4.9)<br><br>OR 1<br>OR 1.60 (0.7, 3.8)<br>OR 2.83 (1.1, 7.4)         | Not provided                               |
| Hatch 2013       | Cache County Memory Study. Longitudinal population based study of all residents aged over 65, identified from Medicare records (90%)<br><br>74.6 years | 5092<br><br>548 all dementia<br><br>369 Alzheimer's disease | 12   | 1459<br>28.7% | Married 65.9%<br>Widowed 29.9%<br>Divorced 4.1%<br><br>Measured in 1995                                                                                  | Age; Sex;<br>Occupation;<br>ApoE                                                                                        | Cox regression      | <b>Dementia</b><br><br><b>Alzheimer's Disease</b><br><br>(Clinical assessment by expert board using valid criteria) | Married<br>Widowed<br>Divorced<br><br>Married<br>Widowed<br>Divorced                                                                                                                  | HR 1<br>HR 0.99 (0.81, 1.22)<br>HR 0.65 (0.37, 1.16)<br><br>HR 1<br>HR 1.04 (0.82, 1.33)<br>HR 0.59 (0.28, 1.25) | 1<br>1.75<br>0.67<br><br>1<br>2.05<br>0.64 |
| Sundström 2014   | Betula prospective cohort study, Umeå Sweden: Longitudinal population-based study                                                                      | 1677<br><br>354                                             | 8.6  | 32<br>2%      | Married 57.6%<br>Widowed 14.2%<br>Divorced 5.7%<br>Single 32.6%                                                                                          | Age; Sex; Alcohol;<br>mental illness;<br>availability of a close friend;                                                | Cox regression      | <b>Dementia</b><br><br>Clinical assessment by                                                                       | Married<br>Widowed<br>Divorced<br>Single                                                                                                                                              | 1<br>HR 1.30 (1.0, 1.7)<br>HR 1.32 (0.9, 2.1)<br>HR 1.09 (0.6, 1.9)                                              | 1.42<br>1.48<br>1.59                       |

|                     |                                                                                                                                                                                      |                           |     |             |                                                                                                                                                                                                                                                                                    |                                                      |                     |                                                                                                                   |                                                                     |                                                                         |                                                    |
|---------------------|--------------------------------------------------------------------------------------------------------------------------------------------------------------------------------------|---------------------------|-----|-------------|------------------------------------------------------------------------------------------------------------------------------------------------------------------------------------------------------------------------------------------------------------------------------------|------------------------------------------------------|---------------------|-------------------------------------------------------------------------------------------------------------------|---------------------------------------------------------------------|-------------------------------------------------------------------------|----------------------------------------------------|
|                     | derived from general population stratified by age and sex. (87%)<br>74.7 years                                                                                                       |                           |     |             | Assessed in 1993-5                                                                                                                                                                                                                                                                 | parental status                                      |                     | 2 independent physicians using valid criteria                                                                     |                                                                     |                                                                         |                                                    |
| Sundström 2016      | Linnaeus database, Sweden: Linked population data from healthcare and death records for entire population<br><br>69.4 years<br><br>(other group of people aged 50-64, mean age 56.1) | 750129<br><br>25722       | 6   | 32065<br>1% | <b>Men:</b><br>Married 68.1%<br>Widowed 3.5%<br>Divorced 15.0%<br>Single 13.5%<br><b>Women:</b><br>Married 61.8%<br>Widowed 13.1%<br>Divorced 17.0%<br>Single 8.2%<br><br><b>Total:</b><br>Married 64.9%<br>Widowed 8.4%<br>Divorced 16.0%<br>Single 10.8%<br><br>Assessed in 1997 | Age; Sex;<br>Parental status;<br>Edu; Income;<br>CVD | Cox regression      | <b>Dementia</b><br><br>Derived from clinical records or death certificates:<br>Specificity 98%<br>Sensitivity 55% | <b>All aged 65-74</b><br>Married<br>Widowed<br>Divorced<br>Single   | HR 1<br>HR 1.12 (1.1, 1.2)<br>HR 1.42 (1.4, 1.5)<br>HR 1.23 (1.2, 1.3)  | <b>(Age-adjusted)</b><br>1<br>1.11<br>1.42<br>1.25 |
|                     |                                                                                                                                                                                      |                           |     |             |                                                                                                                                                                                                                                                                                    |                                                      |                     |                                                                                                                   | <b>Men aged 65-74</b><br>Married<br>Widowed<br>Divorced<br>Single   | HR 1<br>HR 1.10 (1.0, 1.2)<br>HR 1.47 (1.4, 1.6)<br>HR 1.29 (1.2, 1.4)  | <b>(Age-adjusted)</b><br>1<br>1.10<br>1.48<br>1.32 |
|                     |                                                                                                                                                                                      |                           |     |             |                                                                                                                                                                                                                                                                                    |                                                      |                     |                                                                                                                   | <b>Women aged 65-74</b><br>Married<br>Widowed<br>Divorced<br>Single | HR 1<br>HR 1.10 (1.1, 1.4)<br>HR 1.36 (1.3, 1.4)<br>HR 1.16 (1.1, 1.3)  | <b>(Age-adjusted)</b><br>1<br>1.11<br>1.36<br>1.18 |
|                     |                                                                                                                                                                                      |                           |     |             |                                                                                                                                                                                                                                                                                    |                                                      |                     |                                                                                                                   | <b>All aged 50-64</b><br>Married<br>Widowed<br>Divorced<br>Single   | HR 1<br>HR 1.28 (1.1, 1.4)<br>HR 1.79 (1.7, 1.9)<br>HR 1.71 (1.6, 1.9)  | Not provided                                       |
| <b>CASE-CONTROL</b> |                                                                                                                                                                                      |                           |     |             |                                                                                                                                                                                                                                                                                    |                                                      |                     |                                                                                                                   |                                                                     |                                                                         |                                                    |
| Beard 1992          | Rochester, USA. Epidemiology Project. Cases selected from records of Mayo Clinic which delivered medical care to most residents.<br><br>80.4 years                                   | 241 cases<br>241 controls | N/A | 0           | Married 28.8%<br>Widowed 48.0%<br>Divorced 5.4%<br>Single 17.8%<br><br>Assessed at point of diagnosis (1975-79)                                                                                                                                                                    | Matched by age and sex                               | Logistic regression | <b>Alzheimer's Disease</b><br><br>Clinical diagnoses confirmed against valid criteria by psychiatrist.            | Married<br>Widowed<br>Divorced<br>Single                            | OR 1<br>OR 1.10 (0.7, 1.7)<br>OR 1.25 (0.5, 2.9)<br>OR 1.07 (0.6, 1.8)  | Not provided                                       |
|                     |                                                                                                                                                                                      |                           |     |             |                                                                                                                                                                                                                                                                                    |                                                      |                     |                                                                                                                   | <b>Men</b><br>Married<br>Widowed<br>Divorced<br>Single              | OR 1<br>OR 1.24 (0.8, 1.8)<br>OR 3.45 (0.9, 14.0)<br>OR 1.73 (0.3, 9.7) | Not provided                                       |
|                     |                                                                                                                                                                                      |                           |     |             |                                                                                                                                                                                                                                                                                    |                                                      |                     |                                                                                                                   | <b>Women</b><br>Married<br>Widowed<br>Divorced<br>Single            | OR 1<br>OR 0.98 (0.8, 1.2)<br>OR 0.77 (0.4, 1.4)<br>OR 0.94 (0.7, 1.2)  | Not provided                                       |

|                            |                                                                                                                                                                                                                                                                                     |                           |      |                     |                                                                                                                                                                      |                                                                                                       |                         |                                                                                             |                        |      |   |
|----------------------------|-------------------------------------------------------------------------------------------------------------------------------------------------------------------------------------------------------------------------------------------------------------------------------------|---------------------------|------|---------------------|----------------------------------------------------------------------------------------------------------------------------------------------------------------------|-------------------------------------------------------------------------------------------------------|-------------------------|---------------------------------------------------------------------------------------------|------------------------|------|---|
| Seidler 2003               | Frankfurt, Germany. Cases selected from general practice registers: (77% agreed to participation)<br><br>Controls selected as random sample of population register >65 years (61%) AND sample from general practice register (90%)<br><br>Cases: 79.5 years<br>Controls: 75.4 years | 195 cases<br>229 controls | N/A  | 29<br>6%            | Married 78.5%<br>Widowed 11.1%<br>Divorced 3.8%<br>Single 6.6%<br><br>Derived in c2001 from interview with patient or next-of-kin based on marital status when 50yrs | Age; sex; edu; region; family history; smoking                                                        | Logistic regression     | <b>Dementia</b><br><br>Clinical diagnoses confirmed against valid criteria by psychiatrist. | <i>Status at 30yrs</i> |      |   |
|                            |                                                                                                                                                                                                                                                                                     | Married                   |      |                     |                                                                                                                                                                      |                                                                                                       |                         |                                                                                             | OR 1                   | 1    |   |
|                            |                                                                                                                                                                                                                                                                                     | Widowed                   |      |                     |                                                                                                                                                                      |                                                                                                       |                         |                                                                                             | OR 2.1 (0.7, 6.2)      | 2.50 |   |
|                            |                                                                                                                                                                                                                                                                                     | Divorced                  |      |                     |                                                                                                                                                                      |                                                                                                       |                         |                                                                                             | OR 1.0 (0.2, 4.1)      | 1.14 |   |
| Single                     | OR 1.1 (0.6, 2.0)                                                                                                                                                                                                                                                                   | 1.23                      |      |                     |                                                                                                                                                                      |                                                                                                       |                         |                                                                                             |                        |      |   |
| <i>Status at 50yrs</i>     |                                                                                                                                                                                                                                                                                     |                           |      |                     |                                                                                                                                                                      |                                                                                                       |                         |                                                                                             |                        |      |   |
| Married                    | OR 1                                                                                                                                                                                                                                                                                | 1                         |      |                     |                                                                                                                                                                      |                                                                                                       |                         |                                                                                             |                        |      |   |
| Widowed                    | OR 1.2 (0.6, 2.3)                                                                                                                                                                                                                                                                   | 1.69                      |      |                     |                                                                                                                                                                      |                                                                                                       |                         |                                                                                             |                        |      |   |
| Divorced                   | OR 0.6 (0.2, 1.8)                                                                                                                                                                                                                                                                   | 0.58                      |      |                     |                                                                                                                                                                      |                                                                                                       |                         |                                                                                             |                        |      |   |
| Single                     | OR 1.1 0.5, 2.5)                                                                                                                                                                                                                                                                    | 1.36                      |      |                     |                                                                                                                                                                      |                                                                                                       |                         |                                                                                             |                        |      |   |
| <i>Status 10y earlier</i>  |                                                                                                                                                                                                                                                                                     |                           |      |                     |                                                                                                                                                                      |                                                                                                       |                         |                                                                                             |                        |      |   |
| Married                    | OR 1                                                                                                                                                                                                                                                                                | 1                         |      |                     |                                                                                                                                                                      |                                                                                                       |                         |                                                                                             |                        |      |   |
| Widowed                    | OR 1.0 (0.6, 1.6)                                                                                                                                                                                                                                                                   | 1.47                      |      |                     |                                                                                                                                                                      |                                                                                                       |                         |                                                                                             |                        |      |   |
| Divorced                   | OR 0.5 (0.2, 1.7)                                                                                                                                                                                                                                                                   | 0.57                      |      |                     |                                                                                                                                                                      |                                                                                                       |                         |                                                                                             |                        |      |   |
| Single                     | OR 1.7 (0.7, 4.2)                                                                                                                                                                                                                                                                   | 1.99                      |      |                     |                                                                                                                                                                      |                                                                                                       |                         |                                                                                             |                        |      |   |
| <b>Alzheimer's Disease</b> | <i>Status at 30yrs</i>                                                                                                                                                                                                                                                              |                           |      |                     |                                                                                                                                                                      |                                                                                                       |                         |                                                                                             |                        |      |   |
|                            | Married                                                                                                                                                                                                                                                                             | OR 1                      | 1    |                     |                                                                                                                                                                      |                                                                                                       |                         |                                                                                             |                        |      |   |
|                            | Widowed                                                                                                                                                                                                                                                                             | OR 4.3 (1.4, 12.9)        | 4.14 |                     |                                                                                                                                                                      |                                                                                                       |                         |                                                                                             |                        |      |   |
|                            | Divorced                                                                                                                                                                                                                                                                            | OR 1.3 (0.2, 7.2)         | 1.04 |                     |                                                                                                                                                                      |                                                                                                       |                         |                                                                                             |                        |      |   |
| Single                     | OR 0.7 (0.3, 1.5)                                                                                                                                                                                                                                                                   | 0.99                      |      |                     |                                                                                                                                                                      |                                                                                                       |                         |                                                                                             |                        |      |   |
| <b>Vascular dementia</b>   | <i>Status at 30yrs</i>                                                                                                                                                                                                                                                              |                           |      |                     |                                                                                                                                                                      |                                                                                                       |                         |                                                                                             |                        |      |   |
|                            | Married                                                                                                                                                                                                                                                                             | OR 1                      | 1    |                     |                                                                                                                                                                      |                                                                                                       |                         |                                                                                             |                        |      |   |
|                            | Widowed                                                                                                                                                                                                                                                                             | OR 1.7 (0.2, 14.9)        | 0.73 |                     |                                                                                                                                                                      |                                                                                                       |                         |                                                                                             |                        |      |   |
|                            | Divorced                                                                                                                                                                                                                                                                            | OR 1.5 (0.2, 13.7)        | 0.92 |                     |                                                                                                                                                                      |                                                                                                       |                         |                                                                                             |                        |      |   |
| Single                     | OR 1.7                                                                                                                                                                                                                                                                              | 1.43                      |      |                     |                                                                                                                                                                      |                                                                                                       |                         |                                                                                             |                        |      |   |
| <b>CROSS-SECTIONAL</b>     |                                                                                                                                                                                                                                                                                     |                           |      | <b>Missing data</b> |                                                                                                                                                                      |                                                                                                       |                         |                                                                                             |                        |      |   |
| Correa Ribeiro 2013        | Rio de Janeiro, Brazil. Age and sex-stratified sample selected from clients of a private health-care plan: (98%)<br><br>78.2 years                                                                                                                                                  | 683                       | N/A  | 108<br>12.5%        | Married 41.6%<br>Widowed 40.8%<br>Divorced 7.5%<br>Single 10.1%<br><br>Derived from interview by researcher in 2009                                                  | Age; Sex; edu; Personal income                                                                        | Log-binomial regression | <b>Dementia</b><br><br>Clinical diagnoses by consensus panel on valid criteria              | <i>Status at 30yrs</i> |      |   |
|                            |                                                                                                                                                                                                                                                                                     | 115                       |      |                     |                                                                                                                                                                      |                                                                                                       |                         |                                                                                             | Married                | RR 1 | 1 |
|                            |                                                                                                                                                                                                                                                                                     |                           |      |                     |                                                                                                                                                                      |                                                                                                       |                         | Widowed                                                                                     | RR 1.43 (0.9, 2.3)     | 2.97 |   |
|                            |                                                                                                                                                                                                                                                                                     |                           |      |                     |                                                                                                                                                                      |                                                                                                       |                         | Divorced/separated                                                                          | RR 0.31 (0.1, 2.0)     | 0.24 |   |
|                            |                                                                                                                                                                                                                                                                                     |                           |      |                     |                                                                                                                                                                      |                                                                                                       |                         | Single                                                                                      | RR 0.81 (0.3, 2.1)     | 1.17 |   |
| Fan 2015                   | Taiwan. Nationwide population-based cross-sectional study (36.5%)<br><br>75.7 years                                                                                                                                                                                                 | 10432                     | N/A  | 419<br>5.0%         | Married 64.2%<br>Widowed 31.0%<br>Divorced/single 4.8%<br><br>Derived from researcher interview in 2012                                                              | Age; sex; edu; BMI; Hypertension; Diabetes; CVD; Smoking; alcohol; exercise; social engagement; sleep | Logistic regression     | <b>Dementia</b><br><br>Clinical diagnoses confirmed against valid criteria by psychiatrist. | <i>Status at 30yrs</i> |      |   |
|                            |                                                                                                                                                                                                                                                                                     | 929                       |      |                     |                                                                                                                                                                      |                                                                                                       |                         |                                                                                             | Married                | OR 1 | 1 |
|                            |                                                                                                                                                                                                                                                                                     |                           |      |                     |                                                                                                                                                                      |                                                                                                       |                         | Widowed                                                                                     | OR 1.42 (1.2, 1.8)     | 2.65 |   |
|                            |                                                                                                                                                                                                                                                                                     |                           |      |                     |                                                                                                                                                                      |                                                                                                       |                         | Divorced/single                                                                             | OR 1.20 (0.7, 2.0)     | 1.67 |   |
| Guaita 2015                | Abbiategrosso, Italy. Survey of all residents                                                                                                                                                                                                                                       | 1321                      | N/A  | 2<br>0.2%           | Married 67.1%<br>Widowed 24.6%                                                                                                                                       | Age; Sex; Area of birth;                                                                              | Logistic regression     | <b>All dementia</b><br>Clinical                                                             | Married                | RR 1 | 1 |
|                            |                                                                                                                                                                                                                                                                                     |                           |      |                     |                                                                                                                                                                      |                                                                                                       |                         | Widowed                                                                                     | RR 1.17 (0.5, 2.7)     | 1.18 |   |

|            |                                                                                              |                                                                           |     |            |                                                                                            |                                                                                                               |                     |                                                            |                                          |                                                                          |                           |
|------------|----------------------------------------------------------------------------------------------|---------------------------------------------------------------------------|-----|------------|--------------------------------------------------------------------------------------------|---------------------------------------------------------------------------------------------------------------|---------------------|------------------------------------------------------------|------------------------------------------|--------------------------------------------------------------------------|---------------------------|
|            | aged 70-74 yr. (80.4%)<br><br>71.7 years                                                     | 39 all dementia<br><br>15 Alzheimer's disease<br><br>18 vascular dementia |     |            | Divorced 2.2%<br>Single 6.1%<br><br>Assessed in 2011                                       | Occupation;<br>Education                                                                                      |                     | diagnoses confirmed against valid criteria by geriatrician | Divorced<br>Single                       | RR 0.87 (0.1, 7.2)<br>RR 2.52 (0.8, 7.8)                                 | 1.26<br>2.44              |
|            |                                                                                              |                                                                           |     |            |                                                                                            |                                                                                                               |                     | <b>Alzheimer's Disease</b>                                 | Married<br>Widowed<br>Divorced<br>Single | RR 1<br>RR 1.05 (0.3, 3.8)<br>RR 2.42 (0.3, 23.0)<br>RR 1.31 (0.2, 11.0) | 1<br>1.18<br>3.09<br>1.18 |
|            |                                                                                              |                                                                           |     |            |                                                                                            |                                                                                                               |                     | <b>Vascular dementia</b>                                   | Married<br>Widowed<br>Divorced<br>Single | RR 1<br>RR 1.8 (0.5, 6.2)<br>RR --<br>RR 5.63 (1.3, 23.8)                | 1<br>1.45<br>--<br>1.45   |
| Zhang 2006 | China: prevalence study conducted across four different communities. (94%)<br><br>68.2 years | 34807<br><br>732 Alzheimer's Disease<br><br>295 vascular dementia         | N/A | 59<br>0.1% | Married 77.4%<br>Widowed 20.8%<br>Divorced/single 1.6%<br><br>Assessed in over 55s in 1997 | Age; Sex; Edu; Rural/urban dwelling; ethnicity; occupation; age/region interaction; sex/education interaction | Logistic regression | <b>Alzheimer's Disease</b>                                 | Married<br>Widowed<br>Divorced/Single    | OR 1<br>OR 1.4 (1.1, 1.7)<br>OR 2.0 (0.8, 5.0)                           | 1<br>5.2<br>2.3           |
|            |                                                                                              |                                                                           |     |            |                                                                                            |                                                                                                               |                     | <b>Vascular Dementia</b>                                   | Married<br>Widowed<br>Divorced/Single    | OR 1<br>OR 0.6 (0.5, 0.9)<br>OR 1.0 (0.4, 2.4)                           | 1<br>1.1<br>0.9           |

Key: ADLs = Activities of daily living; BMI = body mass index; CVD = cardiovascular disease; Edu = education; HR = Hazard ratio; OR = Odds ratio; RR = Risk ratio

Notes: Shaded results are those which have been provided on request by study authors. *Italicised results* are those which we calculated from study data e.g. when confidence intervals were not provided.

**Supplementary table 3. Rating criteria for quality of included studies and results from quality rating.**

\* Indicates a point for methodological quality

**Supplementary table 3a - COHORT STUDIES**

**Selection**

- 1) Representativeness of the exposed cohort
  - a. truly representative of the average person over 65 years in the community with initial response rate over 70% \*
  - b. selected group of users e.g. nurses, volunteers
  - c. no description of the derivation of the cohort
- 2) Selection of the non-exposed cohort
  - a. drawn from the same community as the exposed cohort \*
  - b. drawn from a different source
  - c. no description of the derivation of the non-exposed cohort
- 3) Ascertainment of exposure
  - a. secure record (e.g. public records) \*
  - b. structured questionnaire with details on timing of potential changes of marital status \*
  - c. written self-report
  - d. no description
- 4) Demonstration that outcome of interest was not present at start of study
  - a. yes \*
  - b. no

**Comparability**

- 5) Comparability of cohorts on the basis of the design or analysis (2 \* possible)
  - a. As well as **age and sex**, the study controls for **Education or baseline cognition**\*
  - b. Study additionally controls for a **measure of physical illness AND socio-economic status** \*
  - c. Only adjusts for **age and sex**

**Outcome**

- 6) Assessment of outcome (*dementia*)
  - a. Systematic blind assessment using standard diagnostic criteria \*
  - b. Record linkage
  - c. Self- or carer- report
  - d. no description
- 7) Was follow-up long enough for outcomes to occur
  - a. At least 5 years \*
  - b. no
- 8) Adequacy of follow up of cohorts
  - a. complete follow up - all subjects accounted for \*
  - b. Less than <30 % lost to follow up \*
  - c. follow up rate < 70% (select an adequate %) and no description of those lost
  - d. no statement

|   |                | 1<br>* | 2<br>* | 3<br>* | 4<br>* | 5<br>* / ** | 6<br>* | 7<br>* | 8<br>* | Total |
|---|----------------|--------|--------|--------|--------|-------------|--------|--------|--------|-------|
| 1 | Amieva         | c      | *      | d      | *      | *           | *      | *      | c      | 5     |
| 2 | Arai           | c      | *      | d      | *      | c           | c      | *      | d      | 3     |
| 3 | Bae            | b      | *      | d      | *      | c           | *      | b      | c      | 3     |
| 4 | Bickel         | b      | *      | d      | *      | c           | *      | *      | *      | 5     |
| 5 | Fratiglioni    | *      | *      | d      | *      | *           | *      | b      | *      | 6     |
| 6 | Håkansson      | *      | *      | d      | *      | **          | *      | *      | *      | 8     |
| 7 | Hatch          | b      | *      | *      | *      | **          | *      | *      | *      | 5     |
| 8 | Sundström 2014 | *      | *      | d      | *      | *           | *      | *      | *      | 7     |
| 9 | Sundström 2016 | *      | *      | *      | *      | **          | b      | *      | *      | 8     |

## Supplementary table 3b - CASE-CONTROL STUDIES

### Selection

- 1) Is the case definition (*dementia diagnosis*) adequate?
  - a. yes, with independent validation \*
  - b. Record linkage
  - c. no description
- 2) Representativeness of the cases
  - a. consecutive or obviously representative series of cases \*
  - b. potential for selection biases or not stated
- 3) Selection of Controls
  - a. community controls \*
  - b. hospital controls
  - c. no description
- 4) Definition of Controls
  - a. no history of disease (endpoint) \*
  - b. no description of source

### Comparability

- e. Comparability of cases and controls on the basis of the design or analysis (2 \* possible)
  - a. As well as **age and sex**, the study controls for **Education or baseline cognition\***
  - b. study also controls for a **measure of physical illness AND socio-economic status \***
  - c. Only adjusts for **age and sex**

### Exposure

- f. Ascertainment of exposure
  - a. secure record (eg public records) \*
  - b. structured questionnaire with details on timing of potential changes of marital status AND independent verification (notes OR informant) \*
  - c. interview not blinded to case/control status
  - d. written self-report or medical record only
  - e. no description
- g. Same method of ascertainment for cases and controls
  - a. yes \*
  - b. no
- h. Non-Response rate
  - a. same rate for both groups \*
  - b. non respondents described
  - c. rate different and no designation

|   |         | 1<br>* | 2<br>* | 3<br>* | 4<br>* | 5<br>* / ** | 6<br>* | 7<br>* | 8<br>* | Total |
|---|---------|--------|--------|--------|--------|-------------|--------|--------|--------|-------|
| 1 | Beard   | b      | b      | *      | b      | -           | c      | *      | *      | 3     |
| 2 | Seidler | b      | b      | b      | b      | *           | c      | b      | b      | 1     |



### Supplementary table 3c - CROSS-SECTIONAL STUDIES

#### Selection

- 1) Were the criteria for inclusion in the sample clearly defined?
  - a. truly representative of the average person over 65 years in the community \*
  - b. selected group of users eg volunteers
  - c. no description of the derivation of the sample
- 2) Was the initial response rate reported?
  - a. Reported and > 70% \*
  - b. Reported and < 70%
  - c. Not reported

#### Measurements

- 3) Ascertainment of exposure
  - a. secure record (eg public records) \*
  - b. structured questionnaire with details on timing of potential changes of marital status AND independent verification (notes OR informant) \*
  - c. interview not blinded to dementia status
  - d. written self-report or medical record only
  - e. no description
- 4) Assessment of Dementia
  - a. Systematic blind assessment using standard diagnostic criteria \*
  - b. Record linkage \*
  - c. Self- or carer- report
  - d. no description

#### Comparability

- 5) Comparability of cases and controls on the basis of the design or analysis (2 \* possible)
  - a. As well as **age** and **sex**, the study controls for **Education** or **baseline cognition** \*
  - b. study controls for a measure of **physical illness** AND **socio-economic status** \*
  - c. Only adjusts for **age and sex**

|   |                | 1<br>* | 2<br>* | 3<br>* | 4<br>* | 5<br>* / ** |   |
|---|----------------|--------|--------|--------|--------|-------------|---|
| 1 | Correa-Ribeiro | b      | *      | c      | *      | *           | 3 |
| 2 | Fan            | *      | *      | c      | *      | *           | 4 |
| 3 | Guaita         | *      | *      | c      | *      | *           | 4 |
| 4 | Zhang          | *      | *      | e      | *      | *           | 4 |

Supplementary figure 1. Begg's funnel plots for main meta-analyses showing risk for publication bias in published studies.

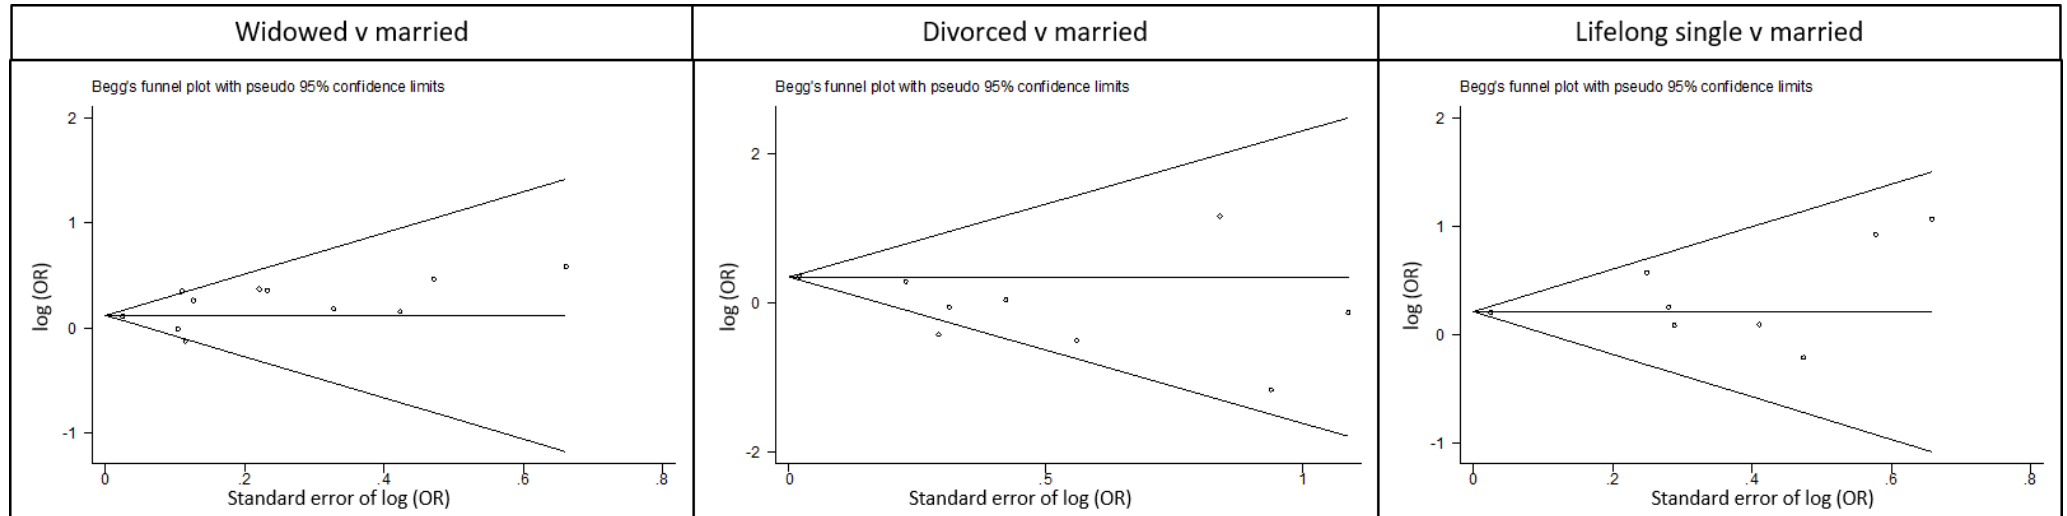

Supplement: jnnp-2017-316274supp001.pdf [file jnnp-2017-316274supp001.pdf]
